# Supplementary material for: TRAP1 protein signature predicts outcome in human metastatic colorectal carcinoma
Source: PubMed Central journal article supplement (PMC5400579; doi:10.18632/oncotarget.15070), 2017-02-03
Supplement: oncotarget-08-21229-s001.pdf [file oncotarget-08-21229-s001.pdf]

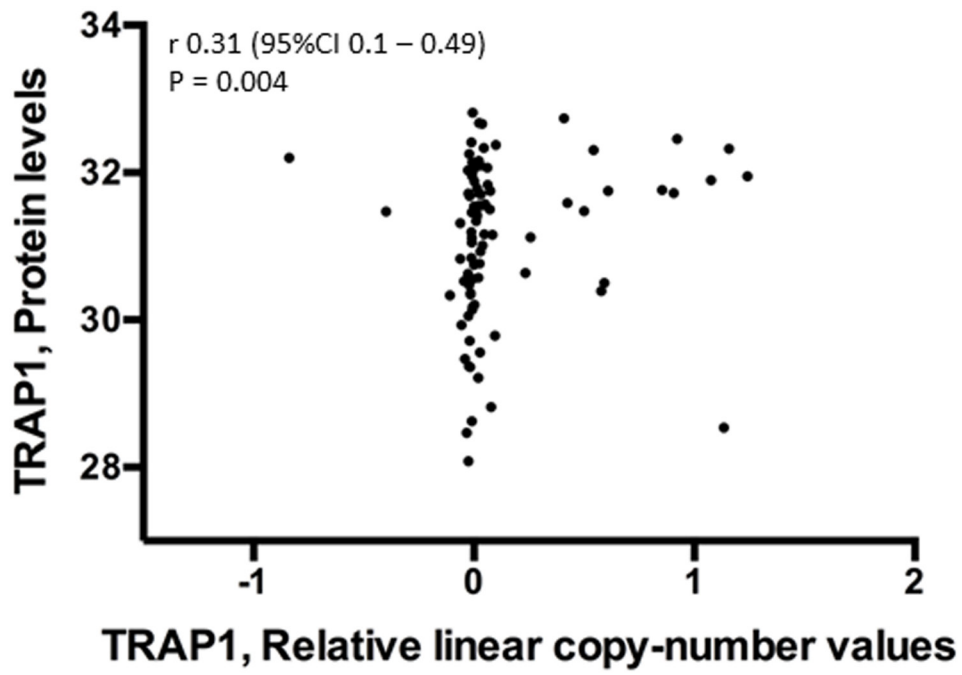

**Supplementary Figure 2: TRAP1 protein expression correlates with its gene copy number.** Correlation between TRAP1 protein expression and its copy number linear level in TCGA Cohort\_2.

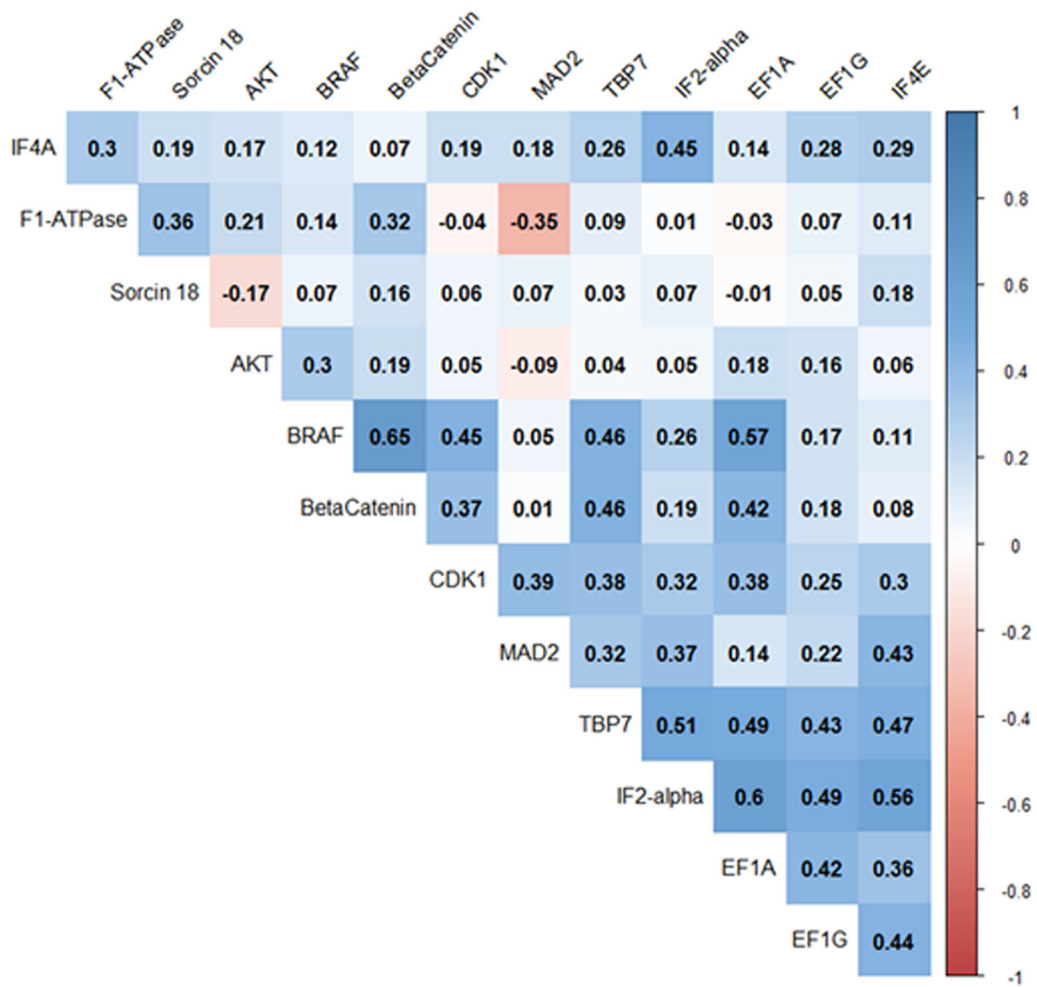

**Supplementary Figure 3: Reciprocal correlation between TRAP1 client proteins.** Correlation plot reporting Spearman r coefficients between TRAP1 network proteins.

**Supplementary Table 1: TRAP1 expression in 60 human colorectal carcinomas and its distribution according to major pathological covariates**

| <b>TRAP1 (60 cases)</b> |                       |                |
|-------------------------|-----------------------|----------------|
| • Mean ( $\pm$ S.D.)    | 13.4 $\pm$ 22.23      |                |
| • Median (range)        | 3.15 (0.11 - 93.48)   |                |
| <b>TNM</b>              | <b>Median (range)</b> | <b>p-value</b> |
| • I                     | 2.4 (0.4 - 48.1)      |                |
| • II                    | 3.7 (0.33 - 93.5)     |                |
| • III                   | 4.005 (0.1 - 82.3)    | 0.83           |
| • IV                    | 2.44 (0.18 - 67.6)    |                |
| <b>Grade</b>            |                       |                |
| • 1                     | 9.33 (0.7 - 93.48)    |                |
| • 2                     | 3.27 (0.11 - 82.24)   | 0.35           |
| • 3                     | 2.55 (0.9 - 67.6)     |                |
| <b>Lymph nodes</b>      |                       |                |
| • N negative            | 3.72 (0.33 - 93.48)   |                |
| • N positive (1-3)      | 3.4 (0.16 - 79.6)     | 0.47           |
| • N positive (>3)       | 2.44 (0.11 - 36.74)   |                |
